# Supplementary material for: Experimental evolution supports the potential of neonicotinoid-pyrethroid combination for managing insecticide resistance in malaria vectors
Source: PubMed Central journal article supplement (PMC8484614; doi:10.1038/s41598-021-99061-x), 2021-09-30
Supplement: 41598_2021_99061_MOESM1_ESM.pdf [file 41598_2021_99061_MOESM1_ESM.pdf]

**Supplementary Fig. S1. Resistance of the parental Tiassalé-S line to insecticides commonly used for vector control.** Insecticide susceptibility tests were performed using WHO test tubes equipped with papers impregnated with 0.05% deltamethrin, 0.5% bendiocarb, 1% fenitrothion and 4% DDT. Mortality rates are expressed as mean mortality  $\pm$  95% Wald confidence interval.

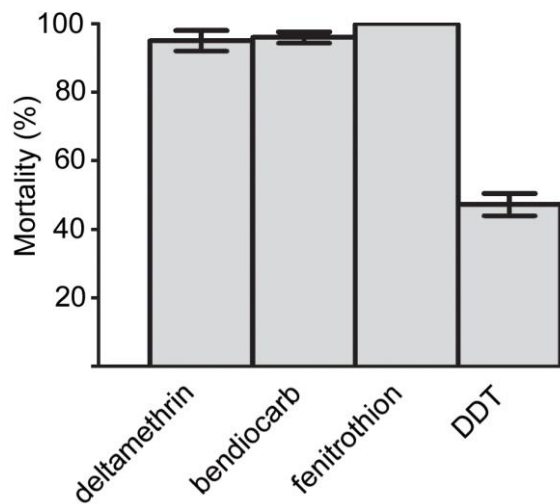

**Supplementary Table S2. Ace1 genotyping data**

| Lines         | Susceptible<br>(119GG) | Heterozygote<br>(119GS) | Resistant<br>(119SS) | N  | f(GG) | f(GS) | f(SS) | Chi2 P<br>value <sup>1</sup> | f(S) | Chi2 P<br>value <sup>1</sup> |
|---------------|------------------------|-------------------------|----------------------|----|-------|-------|-------|------------------------------|------|------------------------------|
| Tiassale-S G0 | 22                     | 1                       | 2                    | 25 | 78,6  | 3,6   | 7,1   | -                            | 0,10 | -                            |
| Delta-R G17   | 27                     | 2                       | 1                    | 30 | 90,0  | 6,7   | 3,3   | 0,695 (ns)                   | 0,07 | 0.73 (ns)                    |
| Clothia-R G17 | 21                     | 8                       | 0                    | 29 | 70,0  | 27,6  | 0,0   | 0,028 (*)                    | 0,14 | 0.565 (ns)                   |
| Fludo-R G17   | 25                     | 4                       | 1                    | 30 | 86,2  | 13,8  | 3,4   | 0,389 (ns)                   | 0,10 | 1 (ns)                       |

<sup>1</sup> Chi<sup>2</sup> tests between each selected line at G17 and the Tiassale-S line at G0 were performed on raw genotype and frequency data. ns: P > 0.05, \* P < 0.05.

**Supplementary Table S3. Transcription data obtained for all genes detected by RNA-seq.** See separated supplementary file.

**Supplementary Fig. S4. Overview of genes differentially transcribed in the three selected lines.** The number of genes is indicated for each line. Numbers within brackets refer to candidate genes potentially involved in insecticide resistance (see methods).

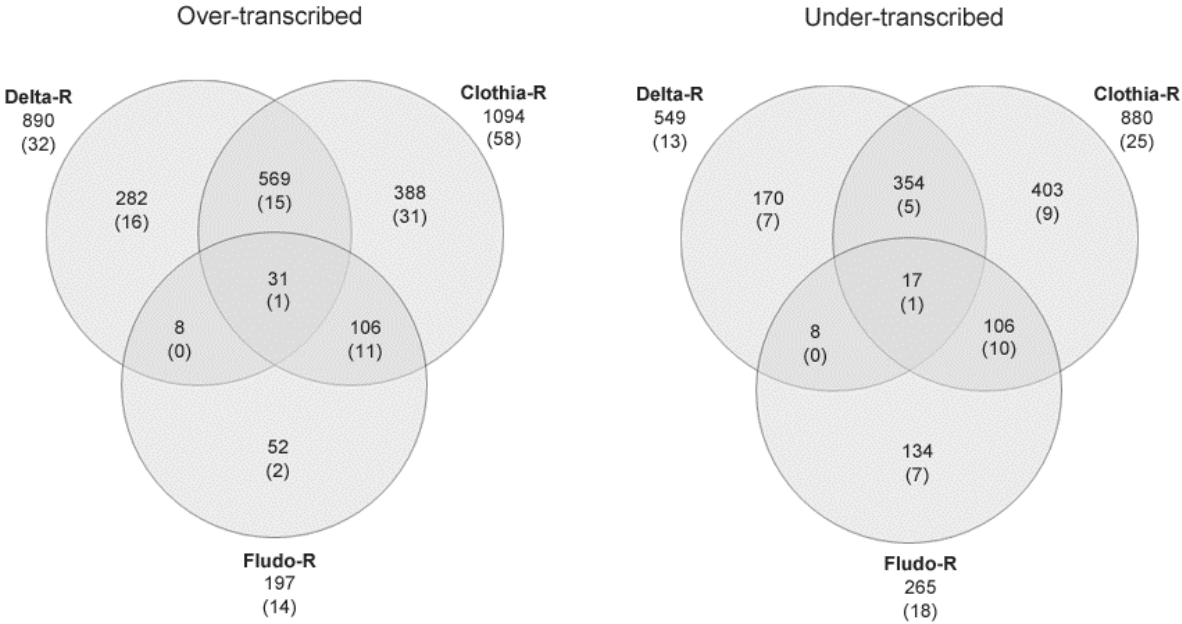

**Supplementary Fig. S5. Overview of GO term enrichment analysis.** Functional pathways enrichment analyses were based on genes significantly over- and under-transcribed in each selected line as compared to Tiassalé-S line using DAVID functional annotation tool (modified Fisher's exact test with  $P < 0.05$ ). Only GO terms from the « biological process » family showing an enrichment associated with a  $P$  value  $< 0.05$  and a minimum number of 9 genes are shown. Fold-enrichment (x axis),  $P$  value (color scale) and class size (dote size) are indicated.

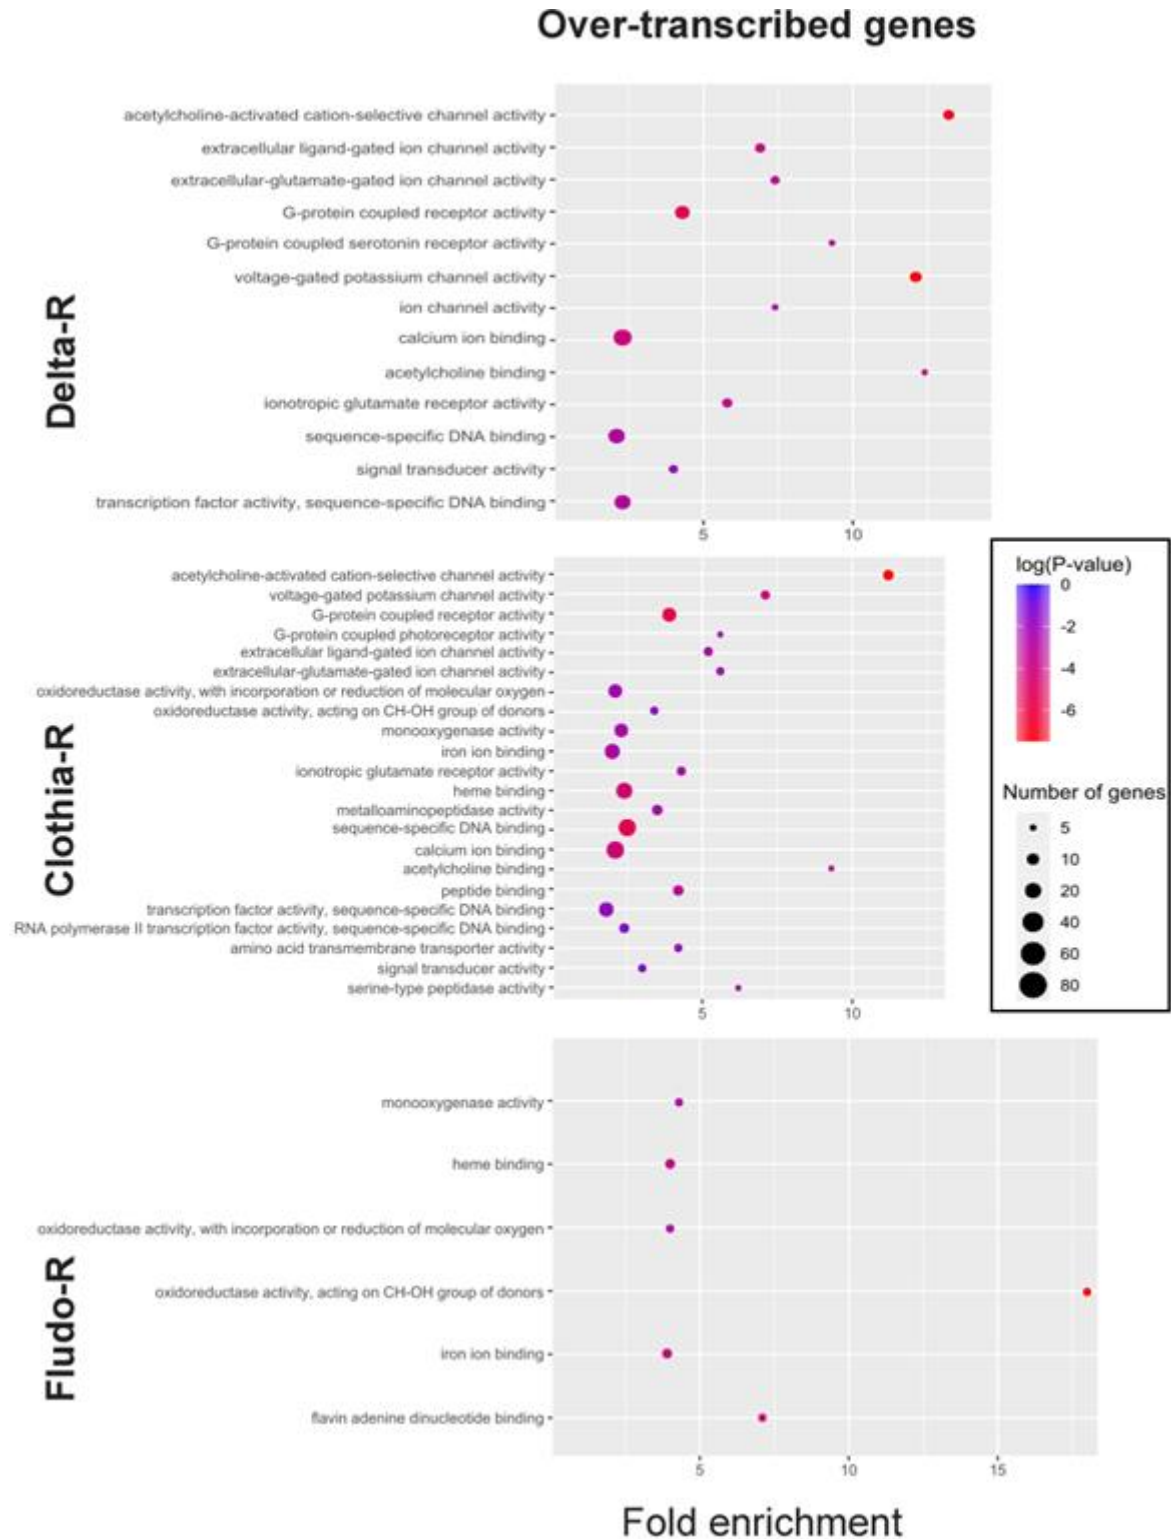

Supplementary Fig. S5 (continued)

### Under-transcribed genes

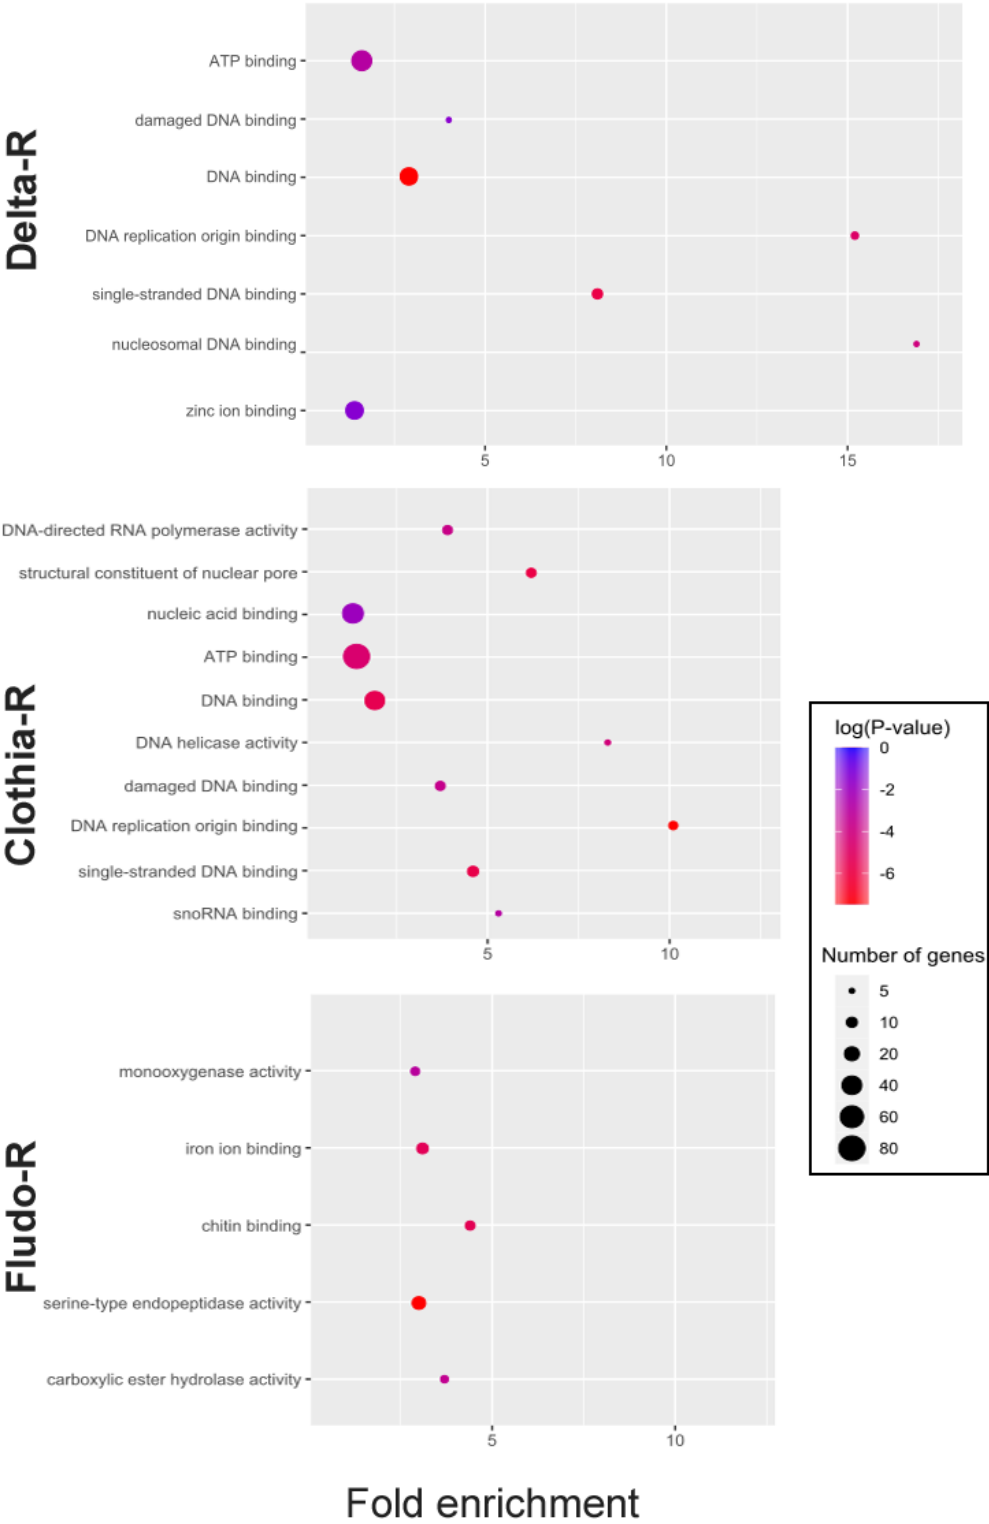

**Supplementary Table S6. SNPs data obtained from RNA-seq.** Only genes containing polymorphic SNPs are shown. See separated supplementary file.

**Supplementary Fig. S7. Association of *CYP6M* genes transcription levels with clothianidin resistance.**

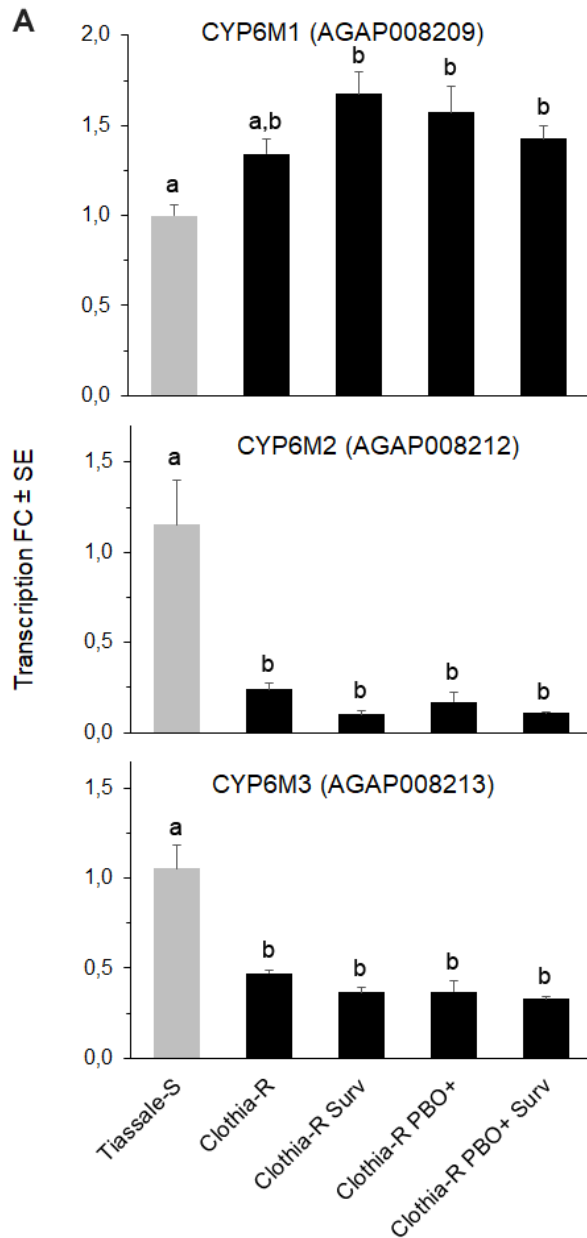

**A:** Transcription profiles of *CYP6M* genes in the following conditions: Tiassalé-S unexposed (Tiassalé-S); Clothia-R unexposed (Clothia-R); Clothia-R surviving to clothianidin exposure (Clothia-R Surv); Clothia-R exposed to PBO (Clothia-R PBO+); Clothia-R exposed to PBO and surviving to clothianidin exposure (Clothia-R PBO+ Surv). Mosquitoes from all conditions were sampled at the same time corresponding to 72h after clothianidin exposure (6-days old). Transcription profiles were obtained by RT-qPCR using four biological replicates per condition. Letters indicate significance between pairs of conditions ( $P < 0.05$ ).

**B:** Effect of PBO pre-exposure on the survival of Clothia-R individuals to clothianidin. Mosquitoes were exposed to 4% PBO for 1h prior exposure to 0.45  $\mu\text{g}/\text{mL}$  clothianidin for 1h. Mortality was recorded 72h after exposure. Letters indicate significance between conditions ( $P < 0.05$ ).

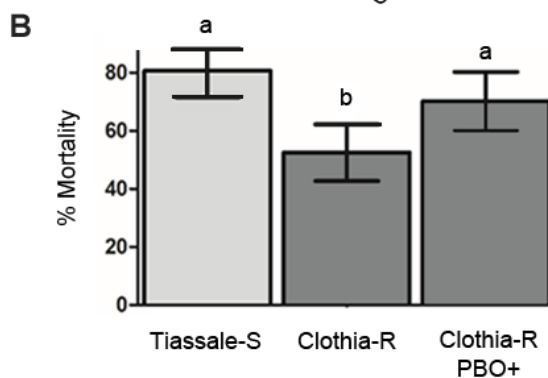

**Supplementary Table S8. *An. gambiae* genes showing high protein homology with genes conferring resistance to neonicotinoids in other insect species.**

| Species                        | Gene name      | References                                               | Degree of evidence                                                                          | <i>An. gambiae</i> orthologs (BlastP score)                                                                                                                             |
|--------------------------------|----------------|----------------------------------------------------------|---------------------------------------------------------------------------------------------|-------------------------------------------------------------------------------------------------------------------------------------------------------------------------|
| <i>Drosophila melanogaster</i> | <i>CYP6G1</i>  | Joußen et al 2008; Sparks et al 2012; Le Goff et al 2003 | Confers resistance to neonicotinoids in transgenic flies, metabolizes imidacloprid          | CYP6P1 (320), CYP6P4 (318), CYP6P3 (315), CYP6M3 (312), CYP6Y2 (300)                                                                                                    |
|                                | <i>CYP12D1</i> | Le Goff et al 2003                                       | Confers resistance to neonicotinoids in transgenic flies                                    | CYP12F1 (372)                                                                                                                                                           |
|                                | <i>CYP6A8</i>  | Le Goff et al 2003                                       | Confers resistance to neonicotinoids in transgenic flies                                    | CYP6M4 (460), CYP6M3 (459), CYP6Y1 (456), CYP6P4 (446), CYP6Y2 (428), CYP6M1 (425), CYP6P3 (416), CYP6P1 (390) CYP6AA2 (373), CYP6Z2 (302), CYP6Z3 (300)                |
| <i>Bemisia tabaci</i>          | <i>CYP6CM1</i> | Karunker et al 2009                                      | Confers resistance to neonicotinoids, metabolizes imidacloprid                              | CYP6M3 (309)                                                                                                                                                            |
| <i>Myzus persicae</i>          | <i>CYP6CY3</i> | Bass et al 2013                                          | Confers resistance to neonicotinoids in transgenic flies, metabolizes imidacloprid in vitro | CYP6M4 (376), CYP6Y1 (373), CYP6M3 (354), CYP6Y2 (353), CYP6P3 (351), CYP6P4 (350), CYP6M1 (342), CYP6AA2 (313), CYP6P1 (304)                                           |
| <i>Nilaparvata lugens</i>      | <i>CYP6ER1</i> | Pang et al 2016, Bao et al 2016, Hamada et al 2020,      | Confers resistance to neonicotinoids in transgenic flies, metabolizes imidacloprid in vitro | CYP6M3 (313), CYP6P4 (301)                                                                                                                                              |
|                                | <i>CYP6AY1</i> | Bao et al 2016                                           | Confers resistance to neonicotinoids, metabolizes imidacloprid in vitro                     | CYP6M3 (385), CYP6M4 (385)                                                                                                                                              |
| <i>Aedes aegypti</i>           | <i>CYP6BB2</i> | Riaz et al 2012                                          | Associated with resistance to neonicotinoids and imidacloprid metabolism                    | CYP6P4 (576), CYP6P3 (554), CYP6P1 (498), CYP6M3 (469), CYP6M4 (450), CYP6Y2 (414), CYP6Y1 (406), CYP6M1 (390), CYP6AA2 (372), CYP6Z2 (322), CYP6Z3 (310), CYP6Z1 (304) |
|                                | <i>CYP6N12</i> | Riaz et al 2012                                          | Associated with resistance to neonicotinoids and imidacloprid metabolism                    | CYP6M3 (588), CYP6M4 (561), CYP6Y1 (523), CYP6Y2 (520), CYP6M1 (516), CYP6P4 (510), CYP6P3 (489), CYP6P1 (452), CYP6AA2 (416), CYP6Z2 (352), CYP6Z3 (347), CYP6Z1 (339) |

**Supplementary Table S9. Primers used for RT-qPCR.**

| Target gene         | Forward primer (5' to 3') | Reverse primer (5' to 3') | Product length (bp) |
|---------------------|---------------------------|---------------------------|---------------------|
| RPS7 (AGAP010592)*  | TTCAACAACAAGAAGGCGATCA    | ACGGGTCTGTACCTTCTGGA      | 149                 |
| CYP6M1 (AGAP008209) | TTTTGAAAGAATCCCTACGCAAG   | GCTCGGGAAATAGACTCGCA      | 162                 |
| CYP6M2 (AGAP008212) | GCACAACGGAGAGATGTCGT      | TGCGCAGTGATTCATTAAGAATTTG | 77                  |
| CYP6M3 (AGAP008213) | GAGACATCTTCCACGCTGCT      | TGCGAAGACTCTCCTTCAGT      | 178                 |

\* housekeeping gene used for normalization

**Supplementary Fig. S9. Amino acid sequence of the two CYP6M1 variants identified in the Tiassalé-S and Clothia-R lines and used for protein modelling.** For each variant, the amino acids in grey boxes differed by more than 50% frequency as compared to the reference genome AgamP4.12 sequence (AGAP008209). Amino acids in red are those supported by an allele frequency variation >50% between the Tiassalé-S line and the Clothia-R line.

**An. gambiae CYP6M1 (Tiassalé-S line)**

MWFPTIEVLVALLALLGGAVYFIVRKQSYWKERG**V**PHPKPTFFFSGFKDAGTKIHFTTEEVERHY**AI**YK GKHPFIGVY**ML**LTTPV  
VLPDLELIKAI FVKDFQYFHDRGTY YNEKHDPLTAHLFNLEGQKWRNLRNKMTPTFTSGKMKMMFPTVVAAGQQLRDFMEEN  
VQKH**G**EMELKDVMARYTTDVI GTCAFGEI CNMRDPDAEFRAMGKLF**M**ERQPSQFVNMMVQFSPKLSRLLGIR**F**IDKEV**S**AFF  
LKVV RDTIDYRV**K**NGIQRNDFMDLMIRMLQNTENPEEALTFNEVAAQAFVFFFAGFETSSTLLTWTLYELALNPEVQEKGRQC  
VQEV LAKHNGEMTY**D**AIH**D**MKYLDQILKESLRKYPPVPLHFR**MTA**QNYRVDPDTSVIEAGTML**F**IP**S**IQRDASLFPEPEKF  
DPERFSAEEEEAKRHPFAWTPFGEGPRVCIGLRFGMMQARIGLAYLLQGF SFAPYEKTSIPMKFITNSFILGPREGWLKVNKL  
ESKQG

**An. gambiae CYP6M1 (Clothia-R line)**

MWFPTIEVLVALLALLGGAVYFIVRKQSYWKERG**I**PHPKPTFFFSGFKDAGTKIHFTTEEVERHY**AL**YK GKHPFIGVY**L**LTTPV  
VLPDLELIKAI FVKDFQYFHDRGTY YNEKHDPLTAHLFNLEGQKWRNLRNKMTPTFTSGKMKMMFPTVVAAGQQLRDFMEEN  
VQKH**D**EMELKDVMARYTTDVI GTCAFGEI CNMRDPDAEFRAMGKLF**D**ERQPSQFVNMMVQFSPKLSRLLGIR**L**IDKEV**S**AFF  
LKVV RDTIDYRV**K**NGIQRNDFMDLMIRMLQNTENPEEALTFNEVAAQAFVFFFAGFETSSTLLTWTLYELALNPEVQEKGRQC  
VQEV LAKHNGEMTY**E**AIH**E**MKYLDQILKESLRKYPPVPLHFR**TS**QNYRVDPDTSVIEAGTML**L**IP**A**IQRDASLFPEPEKF  
DPERFSAEEEEAKRHPFAWTPFGEGPRVCIGLRFGMMQARIGLAYLLQGF SFAPYEKTSIPMKFITNSFILGPREGWLKVNKL  
ESKQG
